# Supplementary material for: Modelling fast mode dielectric relaxation of counterions in aqueous solutions of ionene bromides and fluorides
Source: Royal Society of Chemistry journal article supplement (doi:10.1039/b914938b), 2009-01-01
Supplement: b914938b.pdf [file b914938b.pdf]

SUPPLEMENTARY INFORMATION

**Modelling Fast Mode Dielectric Relaxation of Counterions in Aqueous Solutions of  
Ionene Bromides and Fluorides.**

Miha Lukšič,<sup>a</sup> Barbara Hribar-Lee,<sup>a,\*</sup> Richard Buchner,<sup>b</sup> and Vojko Vlachy<sup>a</sup>

<sup>a</sup>*Faculty of Chemistry and Chemical Technology, University of Ljubljana,  
Aškerčeva c. 5, SI-1000 Ljubljana, Slovenia*

<sup>b</sup>*Institute for Physical and Theoretical Chemistry, University of Regensburg,  
Universitätstrasse 31, D-93040 Regensburg, Germany*

\*Corresponding author. [barbara.hribar@fkkt.uni-lj.si](mailto:barbara.hribar@fkkt.uni-lj.si)

|                 | 3,3-              |                  | 4,5-              |                  | 6,6-              |                  | 6,9-              |                  |
|-----------------|-------------------|------------------|-------------------|------------------|-------------------|------------------|-------------------|------------------|
| $\approx c / M$ | $\Phi(\text{Br})$ | $\Phi(\text{F})$ | $\Phi(\text{Br})$ | $\Phi(\text{F})$ | $\Phi(\text{Br})$ | $\Phi(\text{F})$ | $\Phi(\text{Br})$ | $\Phi(\text{F})$ |
| 0.02            | 0.349             | 0.384            | 0.413             | 0.462            | 0.448             | 0.451            | 0.504             | 0.453            |
| 0.03            | 0.352             | 0.390            | 0.418             | 0.475            | 0.453             | 0.459            | 0.509             | 0.469            |
| 0.05            | 0.356             | 0.398            | 0.426             | 0.495            | 0.459             | 0.473            | 0.517             | 0.492            |
| 0.07            | 0.359             | 0.404            | 0.431             | 0.509            | 0.464             | 0.483            | 0.522             | 0.510            |

**Table S-I:** Osmotic coefficients of 3,3-; 4,5-; 6,6-; and 6,9-ionene bromides,<sup>†</sup>  $\Phi(\text{Br})$ , and fluorides,<sup>‡</sup>  $\Phi(\text{F})$ , as a function of concentration at 298 K. (<sup>†</sup> K. Arh, C. Pohar, and V. Vlachy, *J. Phys. Chem. B*, 2002, **106**, 99679973; <sup>‡</sup> I. Lipar, P. Zalar, and C. Pohar, *unpublished work.*)

|                 | 3,3-                            |                  |                                |                 | 4,5-                            |                  |                                |                 |
|-----------------|---------------------------------|------------------|--------------------------------|-----------------|---------------------------------|------------------|--------------------------------|-----------------|
| $\approx c / M$ | $\tau_1(\text{Br}) / \text{ps}$ | $S_1(\text{Br})$ | $\tau_1(\text{F}) / \text{ps}$ | $S_1(\text{F})$ | $\tau_1(\text{Br}) / \text{ps}$ | $S_1(\text{Br})$ | $\tau_1(\text{F}) / \text{ps}$ | $S_1(\text{F})$ |
| 0.02            | (2940)                          | 8.31             | 1030                           | 7.41            | 1600                            | 6.34             | 1430                           | 7.04            |
| 0.03            | 761                             | 4.84             | 847                            | 8.64            | 1256                            | 6.34             | 911                            | 7.84            |
| 0.05            | 582                             | 6.95             | 726                            | 11.46           | 626                             | 7.94             | 828                            | 10.03           |
| 0.07            | 462                             | 8.82             | 584                            | 12.71           | 559                             | 8.70             | 661                            | 10.91           |
|                 | 6,6-                            |                  |                                |                 | 6,9-                            |                  |                                |                 |
| $\approx c / M$ | $\tau_1(\text{Br}) / \text{ps}$ | $S_1(\text{Br})$ | $\tau_1(\text{F}) / \text{ps}$ | $S_1(\text{F})$ | $\tau_1(\text{Br}) / \text{ps}$ | $S_1(\text{Br})$ | $\tau_1(\text{F}) / \text{ps}$ | $S_1(\text{F})$ |
| 0.02            | 797                             | 4.01             | 1170                           | 4.77            | 1040                            | 4.63             | 1940                           | 5.56            |
| 0.03            | 703                             | 4.95             | 1010                           | 5.88            | 730                             | 4.99             | 1390                           | 5.74            |
| 0.05            | 585                             | 6.41             | 876                            | 7.08            | 606                             | 6.21             | 898                            | 5.89            |
| 0.07            | 468                             | 7.09             | 769                            | 7.97            | 507                             | 7.56             | 798                            | 6.02            |

**Table S-II:** Relaxation times,  $\tau_1$ , and amplitudes,  $S_1$ , attributed to the fast-mode relaxation of counterions in aqueous solutions of 3,3-; 4,5-; 6,6-; and 6,9-ionene bromides (Br) and fluorides (F) as a function of concentration at 298 K. (M. Lukšič, R. Buchner, B. Hribar-Lee, and V. Vlachy, *Macromolecules*, 2009, **42**, 4337–4342.)

| $\approx c / M$ | 3,3- |     | 4,5- |     | 6,6- |     | 6,9- |     |
|-----------------|------|-----|------|-----|------|-----|------|-----|
|                 | (Br) | (F) | (Br) | (F) | (Br) | (F) | (Br) | (F) |
| 0.02            | 21   | 23  | 14   | 17  | 11   | 12  | 13   | 13  |
| 0.03            | 13   | 20  | 11   | 15  | 10   | 11  | 11   | 11  |
| 0.05            | 12   | 18  | 10   | 13  | 9    | 9   | 9    | 9   |
| 0.07            | 12   | 16  | 9    | 11  | 8    | 8   | 9    | 7   |

**Table S-III:** The correlation length,  $L_{S,Ito}$ , in Å, calculated from equation 9, for 3,3-; 4,5-; 6,6-; and 6,9-ionene bromides, and fluorides, as a function of concentration at 298 K.
